# Supplementary material for: The times they are a-changin’
Source: Oxford University Press journal article supplement (doi:10.1242/dev.147447), 2017-01-01
Supplement: dev147447supp.pdf [file dev147447supp.pdf]

## List of reviewers (December 2015 - November 2016)

Reidunn Aalen, University of Oslo, Norway  
Susan Abmayr, Stowers Inst. for Med. Res., United States  
Aziz Aboobaker, University of Oxford, United Kingdom  
Igor Adameyko, Karolinska Institutet, Sweden  
Marius Ader, TU Dresden, Germany  
Paul Adler, Virginia University, United States  
Carrie Adler, Cornell University, United States  
Stein Aerts, KU Leuven, Belgium  
Markus Affolter, University of Basel, Switzerland  
Seema Agarwala, University of Texas, Austin, United States  
Kiyokazu Agata, Kyoto University, Japan  
Nadav Ahituv, UCSF, United States  
Marie-Andree Akimenko, University of Ottawa, Canada  
Denise Al Alam, Childrens Hospital Los Angeles, United States  
Ramiro Alberio, University of Nottingham, United Kingdom  
Soledad Alcantara, University of Barcelona, Spain  
Robin Ali, UCL institute of Ophthalmology, United Kingdom  
Kari Alitalo, University of Helsinki, Finland  
Berta Alsina, Universitat Pompeu Fabra, Spain  
Gonzalo Alvarez-Bolado, University of Heidelberg, Germany  
Jeffrey Amack, SUNY Upstate Medical University, United States  
Richard Amasino, University of Wisconsin, United States  
Enrique Amaya, University of Manchester, United Kingdom  
Victor Ambros, UMass Medical School, United States  
Chris Amemiya, Benaroya Research Institute, United States  
Ditte Andersen, Odense University Hospital, Denmark  
Kathryn Anderson, Sloan-Kettering Institute, United States  
Deborah Andrew, The Johns Hopkins Univ Sch of Med, United States  
Siew-Lan Ang, Francis Crick Institute, Mill Hill Laboratories, United Kingdom  
Gerco Angenent, Clusterleader 'Plant Developmental Systems', Netherlands  
George Annas, Boston University School of Public Health, United States  
Annelien Annelien, UMC Utrecht, Netherlands  
Parker Antin, University of Arizona, United States  
Fugaku Aoki, University of Tokyo, Japan  
Francesco Argenton, Università di Padova, Italy  
Ruth Arkell, RSBS, Australia  
Paola Arlotta, Harvard University, United States  
David Armant, Wayne State University, United States  
Erik Arner, RIKEN, Japan  
Heinz Arnheiter, NINDS, NIH, United States  
David Arnosti, Michigan State Univ., United States  
Natasha Arora, Massachusetts Institute of Technology, United States  
Yvan Arsenijevic, Université de Lausanne, Switzerland  
Adam Arterbery, Yale University School of Medicine, United States  
Kristin Artinger, UC Denver AMC, United States  
Hiroshi Asahara, Tokyo Medical and Dental University Graduate School of Medical and Dental Sciences, Japan  
Akihiro Asai, Cincinnati Children's Hospital Medical Center, United States  
Atsushi Asakura, Univ. Minnesota, United States  
Ruth Ashery-Padan, Tel Aviv University, Israel  
Marie-Liesse Asselin-Labat, The Walter and Eliza Hall Institute of Medical Research, Australia

Alexander Aulehla, EMBL Heidelberg, Germany  
Raj Awatramani, Northwestern University, United States  
Ayyakkannu Ayyanan, EPFL, Switzerland  
Erika Bach, New York University School of Medicine, United States  
Michel Bagnat, Duke University, United States  
Sabine Bailly, cea, France  
Jeroen Bakkers, Hubrecht Institute, Netherlands  
H. Scott Baldwin, Vanderbilt University Medical Center, United States  
Laure Bally-Cuif, CNRS,, France  
Yves-Alain Barde, Cardiff University, United Kingdom  
Nick Barker, Institute of Medical Biology, Singapore  
Linda Barlow, University of Colorado School of Medicine, United States  
Maria Barna, Stanford University, , California 94305, USA, United States  
Scott Barolo, University of Michigan, United States  
Ben Barres, Stanford University School of Medicine, United States  
Madelaine Bartlett, UMass Amherst, United States  
Marisa Bartolomei, Univ of Pennsylvania Sch of Med, United States  
Kathy Barton, Carnegie Inst. of Washington, United States  
Kerstin Bartscherer, Max Planck Institute for Molecular Biomedicine, Germany  
Claudio Basilico, New York University School of Medicine, United States  
Tobias Baskin, University of Massachusetts, United States  
Konrad Basler, University of Zurich, Switzerland  
George Basel, University of Birmingham, United Kingdom  
Eduard Batlle, IRB Barcelona, Spain  
Michele Battle, Medical College of Wisconsin, United States  
Buzz Baum, MRC Laboratory for Molecular Cell Biology &, United Kingdom  
Victoria Bautch, The University of North Carolina, United States  
Megan Beauchemin, University of New England, United States  
Caroline Beck, University of Otago, New Zealand  
Thomas Becker, University of Edinburgh, United Kingdom  
Jeffrey Beekman, UMC Utrecht, Netherlands  
Jo Begbie, Oxford University, United Kingdom  
Gerrit Begemann, University of Bayreuth, Germany  
Richard Behringer, MD Anderson Cancer Center, United States  
Marcel Beining, Ernst Strüngmann Institute (ESI) for Neuroscience in Cooperation with Max Planck Society, Germany  
Dimitris Beis, Foundation Academy of Athens, Greece  
Greg Beitel, Northwestern University, United States  
Hugo Bellen, Baylor College of Medicine, United States  
Catherine Bellini, Umea Plant Science Centre, Sweden  
Saverio Bellusci, Justus-Liebig-University Giessen, Germany  
Yoselin Benitez-Alfonso, University of Leeds, United Kingdom  
Eva Benkova, VIB, Belgium  
Malcolm Bennett, University of Nottingham, United Kingdom  
Tom Bennett, University of Cambridge, United Kingdom  
Dominique Bergmann, Stanford University, United States  
Jason Berman, IWK Health Centre/Dalhousie University, Canada  
Benedikt Berninger, University Medical Center of the Johannes Gutenberg University Mainz, Germany  
Julien BERTRAND, University of Geneva, School of Medicine, Switzerland  
Timothy Bestor, Columbia University, United States  
Isaac Bianco, University College London, United Kingdom  
James Bieker, Mount Sinai School of Medicine, United States  
Ethan Bier, UCSD, United States

Anna Bigas, IMIM-Hospital del Mar, Spain  
Elizabeth Bikoff, University of Oxford, United Kingdom  
David Bilder, University of California-Berkeley, United States  
Walter Birchmeier, Max-Delbrück-Center, Germany  
Kenneth Birnbaum, New York University, United States  
Anthony Bishopp, University of Nottingham, United Kingdom  
Brian Black, University of California, San Francisco, United States  
Clare Blackburn, University of Edinburgh, United Kingdom  
Seth Blackshaw, Johns Hopkins University School of Medicine, United States  
Sandra Blaess, Institute of Reconstructive Neurobiology, Germany  
Seth Blair, University of Wisconsin, United States  
Todd Blankenship, University of Denver, United States  
Cedric Blanpain, Université Libre de Bruxelles (ULB), Belgium  
Francesco Blasi, IFOM, Italy  
Gerd Blobel, The Children's Hospital of Philadelphia, United States  
Nicoletta Bobola, The University of Manchester, United Kingdom  
Michele Boiani, Max Planck Institute for Molecular Biomedicine, Germany  
Joseph V. Bonventre, Brigham and Women's Hospital/Harvard Medical School, United States  
Victor Borrell, CSIC - Universidad Miguel Hernández, Spain  
Anne-Gaelle Borycki, University of Sheffield, United Kingdom  
Vladimir Botchkarev, University of Bradford, United Kingdom  
Jacques Bothma, UC Berkeley, United States  
Maxime Bouchard, McGill University, Canada  
Deborah Bourc'his, Institut Curie, France  
Paola Bovolenta, Centro de Biología Molecular Severo Ochoa. CSIC-UAM., Spain  
Bruce Bowerman, University of Oregon, United States  
Josephine Bowles, University of Queensland, Australia  
John Bowman, Monash, Australia  
Frank Bradke, German Center for Neurodegenerative Diseases, Germany  
Siobhan Brady, UC Davis, United States  
Christian Braendle, Institute of Biology Valrose, France  
Michael Brand, TU Dresden, Germany  
Thomas Brand, Imperial College London, United Kingdom  
Robert Braun, The Jackson Laboratory, United States  
Thomas Braun, Max-Planck-Institut for Heart and Lung Research, Germany  
Sarah Bray, University of Cambridge, United Kingdom  
Alexander Brehm, Institute of Molecular Biology and Tumor Research, University Marburg, Germany, Germany  
Jane Brennan, University of Edinburgh, United Kingdom  
Julie Brill, The Hospital for Sick Children, Canada  
James Briscoe, The Francis Crick Institute, United Kingdom  
Ali Brivanlou, The Rockefeller University, United States  
Kendal Broadie, Vanderbilt University, United States  
Neil Brockdorff, MRC Clinical Sciences Centre, United Kingdom  
Steven Brody, Washington University School of Medicine, United States  
Marianne Bronner, California Institute of Technology, Pasadena, United States  
Nicholas Brown, University of Cambridge, United Kingdom  
Anthony Brown, Weill Cornell Medical College, United States  
Colin Brownlee, Marine Biological Association, UK, United Kingdom  
Ashley Bruce, University of Toronto, Canada  
Katja Brueckner, University of California San Francisco, United States  
Benoit Bruneau, Gladstone Institute of Cardiovascular Disease, United States  
Jean-Francois Brunet, CNRS, France

Oliver Brüstle, University of Bonn, Germany  
Joseph Brzezinski IV, University of Colorado Denver, United States  
Gregor Bucher, Georg-August-Universität, Germany  
Matthew Buechner, University of Kansas, United States  
Hannes Buelow, Albert Einstein College of Medicine, United States  
Yosef Buganim, Hebrew University, Israel  
Scott Bultman, University of North Carolina at Chapel Hill, United States  
Steve Burden, Molecular Neurobiology Program Skirball Institute, United States  
Rebecca Burdine, Princeton University, United States  
Shawn Burgess, NHGRI/NIH, United States  
Robert D Burke, University of Victoria, Canada  
Caroline Burns, Massachusetts General Hospital, United States  
C Geoffrey Burns, Massachusetts General Hospital, United States  
Jeffrey Bush, UCSF, United States  
Michael Buszczak, UT Southwestern, United States  
Laura Buttitta, University of Michigan, United States  
Yu Cai, Temasek Life Sciences Laboratory, Singapore  
Chenleng Cai, Mount Sinai School of Medicine, United States  
Federico Calegari, CRTD, Germany  
Brian Calvi, Indiana University, United States  
Gerard Campbell, University of Pittsburgh, United States  
Kenneth Campbell, Cincinnati Children's Hospital Medical Center, United States  
Marina Campione, CNR Institute of Neurosciences, Italy  
Héctor Candela, Universidad Miguel Hernández de Elche, Spain  
Cristian Canestro, University of Barcelona, Spain  
Xinwei Cao, St Jude Children's Research Hospital, United States  
Wellington Cardoso, Columbia University Medical Center, United States  
Anna Cariboni, UNIVERSITY COLLEGE LONDON, United Kingdom  
Leif Carlsson, Umea University, Sweden  
Peter Carmeliet, VIB - KU Leuven, Belgium  
Tom Carney, IMCB, Singapore  
Jason Carroll, Cambridge Research Institute, United Kingdom  
Jorge Casal, Institute for agricultural plant physiology and ecology, Argentina  
Stuart Casson, University of Sheffield, United Kingdom  
Valérie Castellani, University of Lyon, University of Lyon1, France  
James Castelli-Gair Hombria, CSIC/JA/Universidad Pablo de Olavide, Spain  
Diogo Castro, Instituto Gulbenkian de Ciência, Portugal  
Florencia Cavodeassi, Centro de Biología Molecular Severo Ochoa, Spain  
Michel Cayouette, Institut rech cliniqu Montreal, Canada  
Francesc Cebria, University of Barcelona, Spain  
Lázaro Centanin, Centre for Organismal Studies Heidelberg, Germany  
Connie Cepko, Harvard Medical School, United States  
Robert CERNY, Charles University in Prague, Czech Republic  
Kara Cervený, Reed College, United States  
Yang Chai, University of Southern California, United States  
Jerome Chal, Brigham and Women's Hospital, United States  
Kevin Chalut, Cambridge Stem Cell Institute, United Kingdom  
Ian Chambers, University of Edinburgh, United Kingdom  
Danny Chan, Faculty of Medicine Building, Hong Kong  
Chenbei Chang, Univ. of Alabama at Birmingham, United States  
Gavin Chapman, Victor Chang Cardiac Research Institute, Australia  
Cyril Charles, ENS Lyon, France  
Steven Chatfield, University of Toronto Mississauga, Canada  
Catherine Chaussain, University Paris Descartes, France

Claire Chazaud, GReD- INSERM/CNRS/Clermont Université, France  
Kathryn Cheah, The Univ. of Hong Kong, China  
Jau-Nian Chen, University of California, Los Angeles, United States  
Lihsia Chen, University of Minnesota, United States  
Jinhui Chen, Indiana University, United States  
Elizabeth Chen, Johns Hopkins University School of Medicine, United States  
Rujin Chen, Samuel Roberts Noble Foundation, United States  
Xin Chen, Johns Hopkins University, United States  
Bin Chen, University of California, Santa Cruz, United States  
Ariel Chipman, Hebrew Univ of Jerusalem, Israel  
Andrew Chisholm, University of California San Diego, United States  
Ajay Chitnis, NIH, United States  
Kenneth Cho, University of California-Irvine, United States  
Kyunghye Choi, Washington University, United States  
Robert Chow, University of Victoria, Canada  
Lionel Christiaen, NYU, United States  
Vincent Christoffels, University of Amsterdam, Netherlands  
Jonathan Chubb, UCL, United Kingdom  
George Chuck, Plant Gene Expression Center,, United States  
Lena Claesson-Welsh, Uppsala University, Sweden  
Steven Clark, The University of Michigan, United States  
Amander Clark, UCLA, United States  
Jonathan Clarke, MRC Centre for Developmental Neurobiology, United Kingdom  
Robert Clarke, University of Manchester, United Kingdom  
Nat Clarke, Stanford University, United States  
Michael Cleary, University of California, Merced, United States  
Ondine Cleaver, UT Southwestern Medical Center, United States  
Wilson Clements, St Jude Children's Research Hospital, United States  
Hans Clevers, University Medical Center, Netherlands  
Frédéric Clotman, Université catholique de Louvain, Belgium  
Jean-François Cloutier, McGill University, Canada  
Enrico Coen, John Innes Institute, United Kingdom  
James Coffman, MDI Biological Laboratory, United States  
Stephen Cohen, University of Copenhagen, Denmark  
Lucia Colombo, University of Milan, Italy  
Alexander Combes, University of Melbourne, Australia  
Nathalie Compagnone, ICDD, France  
Miguel Concha, Universidad de Chile, Chile  
Frank Conlon, University of North Carolina, United States  
G. Giacomo Consalez, San Raffaele Scientific Institute, Italy  
Ivan Conte, Telethon Institute of Genetics and Medicine, Italy  
Andrew J. Copp, Institute of Child Health, UCL, United Kingdom  
Joshua Corbin, Children's National Medical Center, United States  
Julia Cordero, The Beatson Institute, United Kingdom  
Robert Cornell, Univ. of Iowa Medical School, United States  
Giulio Cossu, University of Manchester, United Kingdom  
Sabine Costagliola, University of Brussels, United Kingdom  
Frank Costantini, Columbia University, United States  
Shaun Coughlin, UCSF, United States  
Leigh Coultas, Walter & Eliza Hall Institute of Medical Research, Australia  
George Coupland, MPI, Germany  
Rachel Cox, Uniformed Services University, United States  
Brian Cox, Toronto, United States  
April Craft, Boston Children's Hospital, United States



Martin Crespi, Institute of Plant Sciences Paris-Saclay, France  
Colin Crist, McGill University, Canada  
Gael Cristofari, IRCAM, Nice, France, France  
Jenifer Croce, CNRS, France  
James Cross, University of Calgary, Canada  
Michele Crozatier, UMR 384 Inserm, France  
Gage Crump, University of Southern California Keck School of Medicine, United States  
Ana Cumano, Unité Lymphopoiesis, France  
Peter Currie, Australian Regenerative Medicine Institute, Australia  
George Daley, Children's Hospital, United States  
Stephen Dalton, University of Georgia, United States  
Christian Dani, UMR6543 CNRS, France  
Jeremy Dasen, NYU School of Medicine, United States  
Irwin Davidson, IGBMC, France  
Alun Davies, Cardiff School of Biosciences, United Kingdom  
Jamie Davies, University of Edinburgh, United Kingdom  
Shannon Davis, U South Carolina, United Kingdom  
Angus Davison, University of Nottingham, United Kingdom  
Alice Davy, CNRS, France  
Alexandre Dayer, University of Geneva, Switzerland  
Francesco Dazzi, King's College London, United Kingdom  
Benoit de Crombrughe, UT M. D. Anderson Cancer Center, United States  
Robb de Jongh, University of Melbourne, Australia  
Jose Luis de la Pompa, Centro Nacional de Investigaciones Cardiovasculares Carlos III (CNIC), Spain  
Stefano De Renzis, EMBL-Heidelberg, Germany  
Edward De Robertis, University of California Los Angeles, United States  
Dirk de Rooij, Utrecht University, Netherlands  
Bert De Rybel, VIB/Ghent University, Belgium  
Ive De Smet, VIB, Belgium  
Lieven de Veylder, Ghent University, Belgium  
Jurrien Dean, National Institutes of Health, United States  
Anne DEBANT, CRBM CNRS, France  
Filippo Del Bene, institut Curie, France  
Katia Del Rio-Tsonis, Miami University, United States  
Paul Delgado Olguin, The Hospital for Sick Children, Canada  
Christos Delidakis, Foundation for Research and Technology - Hellas (FORTH), Greece  
Benjamin Deneen, Baylor College of Medicine, United States  
Angela DePace, Harvard Medical School, United States  
Bart Deplancke, Ecole Polytechnique Fédérale de Lausanne, Switzerland  
Christopher Deppmann, University of Virginia, United States  
Brent Derry, The Hospital for Sick Children, Canada  
Claude Desplan, New York University, United States  
Danelle Devenport, Princeton University, United States  
Sudhansu Dey, Cincinnati Children's Hospital Medical Center, United States  
Luciano Di Croce, Centre for Genomic Regulation (CRG), Spain  
Nick Di Girolamo, UNSW, Australia, Australia  
Giuseppe Diaferia, IEO, Italy  
Ramon Diaz-Trelles, Sanford Burnham Medical Research Institute, United States  
Mary Dickinson, Baylor College of Medicine, United States  
Hugh Dickinson, University of Oxford, United Kingdom  
Mary Dickinson, Baylor College of Medicine, United States  
Thomas Diekwisch, Baylor Texas A&M University, United States

Stefanie Dimmeler, Institute for Cardiovascular Regeneration, Centre of Molecular Medicine, Goethe University Frankfurt, Germany  
Chris Doe, University of Oregon/HHMI, United States  
Maria Doitsidou, The University of Edinburgh, United Kingdom  
Liam Dolan, University of Oxford, United Kingdom  
Maria Dominguez, CSIC (Spanish Research Council), Spain  
Patricia Donahoe, Mass General Hospital, United States  
Juan Dong, Rutgers, United States  
Mary Donohoe, Burke Medical Research Institute/Weill Cornell Medical College, United States  
Richard Dorsky, University of Utah, United States  
Bruce Draper, University of California, Davis, United States  
Sinead Drea, University of Leicester, United Kingdom  
Gregory Dressler, University of Michigan, United States  
Jacques Drouin, Institut de recherches cliniques de Montréal (IRCM), Canada  
Iain Drummond, Massachusetts General Hospital and Harvard Medical School, United States  
Enkui Duan, Institute of Zoology, CAS, China  
Denis Duboule, Univ of Geneva, Switzerland  
Carsten Duch, JGU Mainz, Germany  
Patricia Ducey, Columbia University Medical Center, United States  
Andrew Dudley, University of Nebraska Medical Center, United States  
Francesca Duncan, The University of Kansas Medical Center, United States  
Elaine Dunleavy, National University of Ireland Galway, Ireland  
Sally Dunwoodie, Victor Chang Cardiac Research Institute, Australia  
Delphine Duprez, CNRS, France  
Jean-Maurice Dura, Institute of Human Genetics, France  
Pascale Durbec, IBDM-UMR7288 CNRS, France  
Robert Duronio, University of North Carolina, United States  
Sebastian Dworkin, Monash University, Australia  
Susan Dymecki, Harvard Medical School, United States  
Benjamin Eaton, University of Texas Health Science Center at San Antonio, United States  
Johann Eberhart, University of Texas at Austin, United States  
Karen Echeverri, Stem Cell Institute, University of Minnesota, United States  
Bruce Edgar, German Cancer Research Center (DKFZ)-, Germany  
Jonathan Eggenschwiler, Princeton University, United States  
Boris Egger, University of Fribourg, Switzerland  
Anne Eichmann, Yale University School of Medicine, United States  
Britta Eickholt, Charité - Universitätsmedizin Berlin, Germany  
David Eisenmann, Univ. of Maryland Baltimore County, United States  
Stephen Ekker, Mayo Clinic, United States  
D. Magnus Eklund, Uppsala University, Sweden  
Samir El-dahr, Tulane University School of Medicine, United States  
Andrew Elefanti, Monash University, Australia  
David Elliott, Murdoch Childrens Research Institute, Australia  
Ronald Ellis, Rowan University SOM, United States  
Juan Encinas, Achucarro - Basque Centre for Neuroscience, Spain  
Takaho Endo, RIKEN, Japan  
JoAnne Engebrecht, University of Davis, United States  
Felix Engel, Friedrich-Alexander-Universität Erlangen-Nürnberg, Germany  
Anne Ephrussi, EMBL, Germany  
Douglas Epstein, Univ. of Pennsylvania, United States  
Takumi Era, Institute of Molecular Embryology and Genetics (IMEG), Japan  
Sevinc Ercan, New York University, United States  
Sylvia Erhardt, uni-heidelberg, Germany

Yuval Eshed, Weizmann Institute of Science, Israel  
Mark Estelle, University of California San Diego, United States  
Peter Etchells, School of Biological and Biomedical Sciences, Durham University, United Kingdom  
Heather Etchevers, INSERM UMR\_S910, France  
Sylvia Evans, University of California San Diego, United States  
Todd Evans, Weill Cornell Medical College, United States  
Matthew Evans, Carnegie Institution of Washington, United States  
Andrew Ewald, Johns Hopkins School of Medicine, United States  
James Fadool, Biological Science, United States  
Christian Fankhauser, University of Lausanne, Switzerland  
Isabel Farinas, Universidad de Valencia, Spain  
Peter Farlie, Royal Childrens Hospital, Australia  
Geoff Faulkner, Mater Research Institute - University of Queensland, Australia  
Mark Featherstone, Nanyang Technological University, Singapore  
Robert Feil, University of Montpellier, CNRS, France  
Donna Fekete, Purdue University, United States  
Rodrigo Fernandez-Gonzalez, University of Toronto, Canada  
Greg Findlay, University of Dundee, United Kingdom  
Anthony Firulli, Riley Heart Research Center Wells Center for Pediatric Research Indiana University School of Medicine, United States  
Andy Fischer, The Ohio State University, United States  
Jason Fish, University of Toronto, Canada  
Amanda Fisher, Imperial College, United Kingdom  
Andrew Fleming, University of Sheffield, United Kingdom  
Matthew Foglia, Duke University School of Medicine, United States  
Eloise Foo, University of Tasmania, Australia  
Andrew Forge, UCL, United Kingdom  
Nicolas Fossat, Children's Medical Research Institute, Australia  
Toshi Foster, Plant and Food Research, New Zealand  
Brian Foster, The Ohio State University, United States  
Velia Fowler, The Scripps Research Institute, United States  
Philippa Francis-West, King's College London, United Kingdom  
Dale Frank, Technion - Israel Institute of Technology, Israel  
Stephen Frankenberg, University of Melbourne, Australia  
Manfred Frasch, University of Erlangen Nuremberg, Germany  
Richard Freiman, Brown University, United States  
Laina Freyer, Albert Einstein College of Medicine, United States  
Markus Friedrich, Wayne State University, United States  
Jiri Friml, IST Austria, Austria  
Bernd Fritzsche, University of Iowa, United States  
Maxim Frolov, University of Illinois at Chicago, United States  
Xiangdong Fu, IGDB Beijing, China  
Sabine Fuhrmann, Vanderbilt University Medical Center, United States  
Matthew Fujita, University of Texas at Arlington, United States  
Shigeki Fujiwara, Kochi University, Japan  
Hironobu Fujiwara, RIKEN CDB, Japan  
Akihisa Fukuda, Kyoto University Graduate School of Medicine, Japan  
Tudor Fulga, The Weatherall Institute, United Kingdom  
Helena Fulka, Institute of Animal Science, Czech Republic  
Margaret Fuller, Stanford University School of Medicine, United States  
Andrew Furley, University of Sheffield, United Kingdom  
B. M. Gadella, Utrecht University Faculty of Veterinary Medicine, Netherlands  
Paul Gadue, Children's Hospital of Philadelphia, United States



Jörg Galle, University of Leipzig, Germany  
Brigitte Galliot, University of Geneva, Switzerland  
Jenna Galloway, Massachusetts General Hospital, United States  
David Gamm, University of Wisconsin-Madison, United States  
Maureen Gannon, Vanderbilt University Medical Center, United States  
Fei Gao, Institute of Zoology, Chinese Academy of Sciences, China  
Michael Garabedian, NYU, United States  
Patricia Garcez, Institute of Biomedical Science UFRJ, Brazil  
Hernan Garcia, University of California Berkeley, United States  
Martín García-Castro, University of California, Riverside, United States  
David Gardner, University of Melbourne, Australia  
Charles Gasser, University of California, Davis, United States  
Kai Ge, NIH, United States  
Mary Gehring, MIT, United States  
Anja Geitmann, Université de Montréal, Canada  
Holger Gerhardt, Max-Delbrueck-Center for Molecular Medicine in the Helmholtz Association (MDC), Germany  
John Gerhart, University of California, United States  
Martin Gering, University of Nottingham, United Kingdom  
M. Gershon, Columbia University, United States  
George Gerton, University of Pennsylvania, United States  
Christopher Geyer, East Carolina University, United States  
Amin Ghabrial, Stanford University, United States  
Amin Ghabrial, University of Pennsylvania, United States  
Troy Ghashghaei, North Carolina State University, United States  
Angela Giangrande, IGBMC, France  
Lilach Gilboa, Weizmann Institute of Science, Israel  
Anna Gilles, Institut de Génomique Fonctionnelle de Lyon, France  
Andrew Gillis, University of Cambridge, United Kingdom  
Antonio Giraldez, Yale University, United States  
George Gittes, Children's Hospital of Pittsburgh, United States  
Michael Glotzer, The University of Chicago, United States  
Beverley Glover, University of Cambridge, United Kingdom  
Marina Glukhova, UMR 144 CNRS-Institut Curie, France  
Dorothea Godt, University of Toronto, Canada  
James Godwin, Monash University, Australia  
Magdalena Goetz, Stem Cell Institute, Germany  
Andre Goffinet, Univ Louvain, Belgium  
Andy Golden, NIDDK/NIH, United States  
Andy Golden, NIDDK/NIH, United States  
James Goldman, Columbia University, United States  
Bob Goldstein, University of North Carolina at Chapel Hill, United States  
Allan Goldstein, Massachusetts General Hospital, United States  
Richard Gomer, Texas A&M University, United States  
Jose Luis Gomez-Skarmeta, Universidad Pablo de Olavide, Spain  
Pierre Gonczy, EPFL (Swiss Federal Institute of Technology), Switzerland  
Cayetano Gonzalez, IRB barcelona, Spain  
Acaimo Gonzalez-Reyes, Univ. Pablo de Olavide Ctra, Spain  
Alon Goren, Broad Institute, United States  
Yukiko Gotoh, University of Tokyo, Japan  
Alex Gould, The Francis Crick Institute, United Kingdom  
Martyn Goulding, Salk Institute, United States  
Valerie Gouon-Evans, Mount Sinai School of Medicine, United States  
Mina Gouti, Max Delbruck Centre, Germany

Shubha Govind, CUNY, United States  
Gerard Gradwohl, IGBMC, France  
Anthony Graham, MRC, United Kingdom  
Muriel Grammont, Université Claude Bernard, France  
Michael Granato, University of Pennsylvania, United States  
Barth Grant, Dept. of Molecular Biology and Biochemistry, United States  
Anne Grapin-Botton, DanStem, University of Copenhagen, Denmark  
Julie Gray, University of Sheffield, United Kingdom  
Thomas Greb, Centre for Organismal Studies, Germany  
Markus Grebe, University of Potsdam, Institute of Biochemistry and Biology, Germany  
Jeremy Green, King's College London, United Kingdom  
Andy Greenfield, MRC Harwell, United Kingdom  
David Greening, La Trobe University, Australia  
David Greenstein, University of Minnesota, United States  
Charles Greer, Yale University School of Medicine, United States  
Savraj Grewal, University of Calgary, Canada  
Joost Gribnau, Erasmus University, Netherlands  
Brock Grill, The Scripps Research Institute, Florida, United States  
Daniel Grimes, Princeton University, United States  
Jerome Gros, Institut Pasteur, France  
Jeffrey Gross, University of Pittsburgh School of Medicine, United States  
Rita Gross-Hardt, University of Bremen, Germany  
Phillip Grote, Goethe-Universität Frankfurt, Germany  
Andrew Groves, Baylor College of Medicine, United States  
David Grunwald, University of Utah, United States  
Isabel Guerrero, Centro de Biología Molecular "Severo Ochoa", Spain  
Karine Guevorkian, IGBMC, France  
Antoine Guichet, CNRS - Institut Jacques Monod, France  
Deborah Gumucio, Univ. of Michigan, United States  
Lena Gunhaga, Umeå Center for Molecular Medicine, Sweden  
Ge Guo, University of Cambridge, United Kingdom  
Stephanie Gupton, University of North Carolina at Chapel Hill, United States  
Jennifer Gutzman, University of Wisconsin-Milwaukee, United States  
Raymond Habas, Temple University, United States  
Anna-Katerina Hadjantonakis, Sloan-Kettering Institute, United States  
Petra Hajkova, Imperial College London, United Kingdom  
Georg Halder, Universiteit Leuven, Belgium  
Marc Halfon, SUNY at Buffalo, United States  
Hiroshi Hamada, Osaka University, Japan  
Thorsten Hamann, Norwegian University of Science and Technology, Norway  
Olivier Hamant, ENS Lyon, France  
Amro Hamdoun, UCSD, United States  
Paul Hamel, University of Toronto, Canada  
Matthias Hammerschmidt, Developmental Biology, Germany  
Min Han, HHMI and University of Colorado, United States  
Jin-Kwan Han, Pohang University of Science, Korea, Republic of  
Young-Goo Han, St. Jude Children's Research Hospital, United States  
Mary Ann Handel, The Jackson Laboratory, United States  
Mark Hankelman, University of Toronto, Canada  
Wendy Hanna-Rose, The Pennsylvania State University, United States  
Hidemitsu Harada, Iwate Medical University, Japan  
Christian Hardtke, University of Lausanne, Switzerland  
Iswar Hariharan, University of California, United States  
William Harris, Cambridge Univ., United Kingdom

Matthew Harris, Max Planck Institute Developmental Biology, Germany  
Tony Harris, University of Toronto, Canada  
Melissa Harrison, University of Wisconsin-Madison, United States  
Daniel Hart, UCSF, United States  
Volker Hartenstein, UCLA, United States  
Christine Hartmann, Institut for Experimental Musculoskeletal Medicine (IEMM), Germany  
Hisashi Hashimoto, Nagoya University, Japan  
Takashi Hashimoto, Nara Institute of Science and Technology, Japan  
Bassem Hassan, VIB and KU Leuven School of Medicine, Belgium  
Gerooge Haughn, University of British Columbia, Canada  
Thomas Hawkins, UCL, United Kingdom  
Angela Hay, Max Planck Institute for Plant Breeding Research, Germany  
Shigeo Hayashi, Riken Center for Developmental Biology, Japan  
Xi He, Boston Children's Hospital, United States  
Bing He, Dartmouth College, United States  
Edith Heard, Institut Curie, France  
Joan Heath, Walter and Eliza Hall Institute of Medical Research, Australia  
Jean Hebert, Albert Einstein College of Medicine, United States  
Peter Hedden, Rothamsted Research, Harpenden, Herts AL5 2JQ, UK, United Kingdom  
Carl-Philipp Heisenberg, Institute of Science and Technology Austria, Austria  
Andreas Hejnol, University of Bergen, Norway  
Yka Helariutta, University of Helsinki, Finland  
Susan Henning, BCM, United States  
Domingos Henrique, Instituto de Medicina Molecular, Portugal  
Clarissa Henry, University of Maine, United States  
Luis Herrera-Estrella, Howard Hughes Medical Institute, Mexico  
Masahiko Hibi, Nagoya University, Japan  
Peter Hiesinger, Freie Universität Berlin, Germany  
Tetsuya Higashiyama, Nagoya University, Japan  
Takashi Hiiragi, EMBL, Germany  
Massimo Hilliard, Queensland Brain Institute, The University of Queensland, Australia  
Lindsay Hinck, University of California, Santa Cruz, United States  
Robert Hindges, King's College London, United Kingdom  
Yaniv Hinitz, King's College London, United Kingdom  
Veronica Hinman, Carnegie Mellon University, United States  
David Hipfner, IRCM, Canada  
Hiro-Yuki Hirano, The University of Tokyo, Japan  
Tatsumi Hirata, National institute of Genetics, Japan  
Karen Hirschi, Baylor College of Medicine, United States  
Peter Hitchcock, University of Michigan, United States  
Lawrence Hobbie, Adelphi University, United States  
Oliver Hobert, Columbia University Medical Center, United States  
Ute Hoecker, University of Cologne, Germany  
Matthew Hoffman, National Institutes of Health, United States  
Brigid Hogan, Duke University Medical Center, United States  
Ben Hogan, University of Queensland, Australia  
Linda Holland, Scripps Inst of Oceanography, United States  
Scott Holley, Yale University, United States  
Christine Holt, University of Cambridge, United Kingdom  
Yang Hong, University of Pittsburgh Medical School, United States  
Pamela Hoodless, Terry Fox Laboratory, Canada  
Stefan Hoppler, University of Aberdeen, United Kingdom  
Sevan Hopyan, The Hospital for Sick Children, Canada  
Marko Horb, Marine Biological Laboratory, United States

Valerie Horsley, Yale University, United States  
Mikio Hoshino, Natinal Institute of Neuroscience, NCNP, Japan  
Corinne Houart, MRC, United Kingdom  
Jenny Hsieh, UT Southwestern Medical School, United States  
Meritxell Huch, Wellcome Trust/Cancer Research UK-Gurdon Institute, United Kingdom  
Clare Hudson, OBSERVATOIRE OCEANOLOGIQUE, France  
Simon Hughes, King's College London, United Kingdom  
Chi-Chung Hui, The Hospital for Sick Children, Canada  
Neil Hunter, The Hunter Lab, United Kingdom  
Justin Ichida, University of Southern California, United States  
Tomokatsu Ikawa, RIKEN center for Integrative Medical Sciences, Japan  
Yuuki Imai, Ehime Univ., Japan  
Philip Ingham, Imperial College, London - Nanyang Technological University, Singapore  
Gwyneth Ingram, Ecole Normale Supérieure de Lyon, France  
Tony Ip, Univ of Massachusetts Med Cntr, United States  
Erin Irish, University of Iowa, United States  
Luisa Iruela-Arispe, UCLA, United States  
Kenneth Irvine, Rutgers / HHMI, United States  
Norman Iscove, Princess Margaret Cancer Centre, Canada  
Fumitoshi Ishino, Medical Research Institute, Tokyo Medical and Dental University, Japan  
Anthony Isles, Cardiff University, United Kingdom  
Melanie Issigonis, University of Illinois, United States  
Nobue Itasaki, University of Bristol, United Kingdom  
Toshiro Ito, Temasek Life Sciences Laboratory, Singapore  
Mayumi Ito, NYU Langone Medical Center and School of Medicine, United States  
kenzo Ivanovitch, CNIC, Spain  
Denis Jabaudon, University of Geneva, Switzerland  
Thomas Jack, Dartmouth College, United States  
David Jackson, Cold Spring Harbor Laboratory, United States  
Dave Jackson, CSHL, United States  
Johannes Jaeger, Centre for Genomic Regulation (CRG), Spain  
Krzysztof Jagla, INSERM, France  
Yvon Jaillais, Ecole Normale Supérieure de Lyon, France  
Sam Janes, UCL London, United Kingdom  
Jens Januschke, University of Dundee - School of Life Sciences, United Kingdom  
Sophie Jarriault, IGBMC, France  
Erin Jarvis, University of California, Berkeley, United States  
Heinrich Jasper, Buck, United States  
Kim Jensen, University of Copenhagen, Denmark  
Jukka Jernvall, University of Helsinki, Finland  
Sebastian Jessberger, University of Zurich, Switzerland  
Jianhang Jia, University of Kentucky, United States  
Jin Jiang, UT Southwestern Medical Center, United States  
Rulang Jiang, Cincinnati Children's Hospital Medical Center, United States  
Peihua Jiang, Monell Chemical Senses Center, United States  
Suk-Won Jin, Yale University School of Medicine, United States  
Ying Jin, sibs, China  
Pia Johansson, The Institute of Stem Cell Research, Germany  
Rosalind John, Cardiff University, United Kingdom  
Jane Johnson, Univ. Texas, United States  
Wendy Johnston, Mount Sinai Hospital, United States  
Leanne Jones, Univ. of California- Los Angeles, United States  
Henrik Jonsson, University of Cambridge, United Kingdom  
Alice Jouneau, INRA, France

Alexandra Joyner, Sloan-Kettering Institute, United States  
Vesa Kaartinen, University of Michigan, United States  
kenji kabashima, Kyoto University, Japan  
Ran Kafri, SickKlds, Canada  
Ryoichiro Kageyama, Kyoto University, Japan  
Sundeep Kalantry, University of Michigan Medical School, United States  
Tuzer Kalkan, University of Cambridge, United Kingdom  
Julia Kaltschmidt, Sloan-Kettering Institute, United States  
Tomoko Kaneko-Ishino, Tokai University, Japan  
Artur Kania, Institut de recherches cliniques de Montreal / IRCM, Canada  
Gabrielle Kardon, University of Utah, United States  
Rolf Karlstrom, University of Massachusetts, United States  
Jonathan Katz, University of Pennsylvania School of Medicine, United States  
Yasuhiko Kawakami, University of Minnesota, United States  
Eiryo Kawakami, Riken, Japan  
Takeshi Kawauchi, Keio University School of Medicine, Japan  
Janet Keast, University of Melbourne, Australia  
Gordon Keller, MaRS Centre, Canada  
Raymond Keller, University of Virginia, United States  
Matthew Kelley, NIH, United States  
Robert Kelly, Aix Marseille Universite UMR 7288 CNRS, France  
Gavin Kelsey, Babraham Institute, United Kingdom  
Timothy Kennedy, McGill University, Canada  
Nicoletta Kessaris, University College London, United Kingdom  
Daniel Kessler, University of Pennsylvania, United States  
Bill Keyes, CGR Spain, United Kingdom  
Roger Keynes, University of Cambridge, United Kingdom  
Abderrahman Khila, IGFL-ENS, France  
Thomas Kidd, University of Nevada, United States  
Yutaka Kikuchi, Hiroshima University, Japan  
Carla Kim, Harvard Medical School, United States  
Dennis Kim, MIT, United Kingdom  
David Kimelman, Univ of Washington Sch of Med, United States  
Mary Lou King, Univ. of Miami, United States  
Takeo Kishimoto, Tokyo Institute of Technology, Japan  
Christian Klamt, Universitat Munster, Germany  
Peter Klein, Univ. of Pennsylvania, United States  
Ophir Klein, The University of California, United States  
Thomas Klein, Heinrich-Heine-Universität Düsseldorf, Germany  
Jürgen Kleine-Vehn, Univ. of Natural Resources & Life Sciences Vienna, Austria  
Ela Knapik, Vanderbilt University, United States  
Juergen Knoblich, IMBA, Austria  
Bernd Knoll, University of Ulm, Germany  
Jason Knott, Michigan State University, United States  
Sarah Knox, UCSF, United States  
Paul Knox, University of Leeds, United Kingdom  
Eli Knust, Max Planck Institute, Germany  
Tatsuya Kobayashi, Massachusetts General Hospital, United States  
Akio Kobayashi, University of Washington, United States  
Gou Young Koh, KAIST, Korea, Republic of  
Takashi Kondo, KAST, Japan  
Hisato Kondoh, Kyoto Sangyo University, Japan  
Bon-Kyoung Koo, Wellcome Trust Centre, United Kingdom  
Raphael Kopan, Cincinnati Children's hospital, United States



Thomas Kornberg, University of California, United States  
Hendrik Korswagen, Hubrecht Institute, Netherlands  
Martin Korte, TU Braunschweig, Germany  
Darrell Kotton, Boston University, United States  
Anna Kouznetsova, Karolinska Institutet, Sweden  
Elena Kramer, Harvard, United States  
Mark Krasnow, Stanford University School of Medicine, United States  
Rachel Kraut, TU Dresden, Germany  
Paul Krieg, Univ. of Arizona College of Med., United States  
Boudewijn Kruithof, LUMC, Netherlands  
Robb Krumlauf, Stowers Institute, United States  
Akiharu Kubo, Keio University School of Medicine, Japan  
Yoshiaki Kubota, Keio university, Japan  
Justin Kumar, Indiana University, United States  
Tilo Kunath, University of Edinburgh, United Kingdom  
Chay Kuo, Duke University, United States  
Takehiro Kusakabe, Konan University, Japan  
Kenro Kusumi, Arizona State University, United States  
Dorota Kwiatkowska, University of Silesia, Poland  
Chulan Kwon, Johns Hopkins University, United States  
Mark LaBarge, Lawrence Berkeley National Laboratory, United States  
Raj Ladher, NCBS, India  
Diana Laird, UCSF School of Medicine, United States  
Thomas Lamonerie, Institut de Biologie Valrose, France  
Madeline Lancaster, MRC Laboratory of Molecular Biology, United Kingdom  
Christophe Lancrin, European Molecular Biology Laboratory, Italy  
Matthias Landgraf, University of Cambridge, United Kingdom  
Richard Lang, Cincinnati Children's Hospital Medical Center, United States  
Jane Langdale, University of Oxford, United Kingdom  
Guillermo Lanuza, Leloir Institute, Argentina  
John Larkin, Louisiana State University, United States  
Marta Laskowski, Oberlin College, United States  
Andrew Lassar, Harvard Med. Sch., United States  
Nelson Lau, Life Science Faculty, United States  
Patrick Laufs, IJPB, France  
Thomas Laux, Univ of Freiburg, Germany  
Robert Lavker, Northwestern, United States  
Nathan Lawson, Univ. Massachusetts Med School, United States  
Paul Layer, Technische Universität Darmstadt, Germany  
Roland Leborgne, CNRS, France  
Virginie Lecaudey, University of Frankfurt, Germany  
Terry Lechler, Duke University, United States  
Tzumin Lee, Janelia Farm Research Campus/HHMI, United States  
Cheng-Yu Lee, University of Michigan Medical School, United States  
Joo-Hyeon Lee, Cambridge Stem Cell Institute, United Kingdom  
Veronique Lefebvre, Lerner Research Institute, United States  
Ruth Lehmann, NYU School of Medicine and HHMI, United States  
Maria Lehtinen, Boston Children's Hospital, United States  
Harry Leitch, University of Cambridge, United Kingdom  
Andrew Leiter, University of Massachusetts Medical School, United States  
Arne Lekven, Texas A&M University, United States  
Frederic Lemaigre, Université catholique de Louvain, Belgium  
Patrick Lemaire, CRBM, France  
Chris Lengner, University of Pennsylvania, United States

Michael Lenhard, Universität Potsdam, Germany  
Pierre-Francois Lenne, CNRS/ Aix-Marseille Université, France  
Giovanni Levi, CNRS/MNHN, France  
Michael Levin, Tufts University, United States  
Mike Levine, Princeton University, United States  
Gil Levkowitz, Weizmann Institute of Science, Israel  
James Li, University of Connecticut Health Center, United States  
Linheng Li, Stowers Inst. for Med. Res., United States  
Eric Liao, Massachusetts General Hospital, United States  
Diana Libuda, University of Oregon, United States  
Ivo Lieberam, King's College London, United Kingdom  
Ellen Lien, Univ Southern Calif, United States  
Graham Lieschke, Monash University, Australia  
Xinhua Lin, Cincinnati children's Hospital medical center, United States  
Shau-Ping Lin, National Taiwan University, Taiwan  
Keith Lindsey, Durham University, United Kingdom  
Brian Link, Medical College of Wisconsin, United States  
Karin List, Wayne State University, United States  
James Lister, Virginia Commonwealth University, United States  
Kui Liu, University of Gothenburg, Sweden  
Jun Kelly Liu, Cornell University, United States  
Karen Liu, King's College London, United Kingdom  
John Logsdon, University of Iowa, United States  
Jan Lohmann, University of Heidelberg, Germany  
Jeff Long, UCLA, United States  
Fanxin Long, Washington University School of Medicine, United States  
Susana Lopes, NOVA Medical School, Portugal  
Guillermina Lopez-Bendito, Instituto de Neurociencias de Alicante, Spain  
Hernan Lopez-Schier, Helmholtz Zentrum Munchen, Germany  
Matt Lorincz, The University of British Columbia, Canada  
Christopher Lowe, Stanford University, United States  
Sally Lowell, University of Edinburgh, United Kingdom  
Wolfgang Lukowitz, University of Georgia, United States  
Christian Luschnig, University of Natural Resources and Applied Life Sciences, Austria  
Stefan Luschnig, University of Münster, Germany  
Qiufu Ma, Dana-Farber Cancer Institute, United States  
Richard Maas, Brigham & Women's Hospital / Harvard Medical School, United States  
Malcolm Maden, University of Florida, United States  
Jesse Mager, University of Massachusetts, United States  
Erna Magnúsdóttir, University of Iceland, Iceland  
Ari Mähönen, University of Helsinki, Finland  
Eleanor Maine, Syracuse University, United States  
Paul Mains, University of Calgary, Canada  
Pascal Maire, Inst. Cochin, France  
Alexis Maizel, University of Heidelberg, Germany  
Taija Makinen, Uppsala University, Sweden  
Jocelyn Malamy, University of Chicago, United States  
Antonello Mallamaci, SISSA, Italy  
Moises Mallo, Inst. Gulbenkian de Ciencia, Portugal  
Susan Mango, Harvard University, United States  
Nancy Manley, University of Georgia, United States  
Richard Mann, Columbia University, United States  
Alberto Mantovani, Humanitaresearch, Italy  
Miguel Manzanares, CNIC, Spain

Junhao Mao, University of Massachusetts Medical School, United States  
Christophe Marcelle, Monash University, Australia  
Denise Marciano, University of Texas Southwestern Medical Center, United States  
Ralph Marcucio, UCSF, United States  
Rubén Marín Juez, Max Planck Institute for Heart and Lung Research, Germany  
Silvia Marino, Barts and The London SMD, United Kingdom  
Florence Marlow, Albert Einstein College of Medicine, United States  
Carsten Marr, Institute of Computational Biology, Germany  
Nick Marsh-Armstrong, Johns Hopkins University School of Medicine, United States  
Elisa Marti, Consejo Superior de Investigaciones Científicas, Spain  
Donna Martin, The University of Michigan, United States  
James Martin, Baylor College of Medicine, United States  
Paul Martin, University of Bristol, United Kingdom  
Adam Martin, MIT, United States  
Maria Dolores Martin-Bermudo, Univ. Pablo de Olavide., Spain  
Salvador Martinez, University of Murcia, Spain  
Alfonso Martinez Arias, University of Cambridge, United Kingdom  
Jaime Martinez Garcia, CRAG, Consortium CSIC-IRTA-UAB-UB, Spain  
Juan Martinez-Morales, CABD (CSIC/UPO), Spain  
Enrique Martinez-Perez, Imperial College, United States  
Ichiro Masai, Okinawa Institute of Science and Technology Graduate University, Japan  
Vladimir Mashanov, University of Puerto Rico, Puerto Rico  
Patrick Masson, University of Wisconsin, United States  
Grant Mastick, University of Nevada, United States  
Osamu Masui, RIKEN center for Integrative Medical Sciences, Japan  
Takeshi Matsui, RIKEN center for Integrative Medical Sciences, Japan  
Erika Matunis, Johns Hopkins University School of Medicine, United States  
Cedric Mauge, Institute of Developmental Biology of Marseille, France  
Margot Mayer-Pröschel, University of Rochester, United States  
Roberto Mayor, University College London, United Kingdom  
John McCarrey, University of Texas at San Antonio, United States  
David McClay, Duke University, United States  
Pierre McCrea, Univ. Texas MDACC, United States  
Catherine McCusker, University of Massachusetts Boston, United States  
Andrew McMahon, USC, United States  
Helen McNeill, LTRI, Mt Sinai Hospital & Univ. of Toronto, Canada  
Alexander Medvinsky, Inst. for Stem Cell Research, United Kingdom  
Charles Melnyk, The University of Cambridge, United Kingdom  
Cathy Lee Mendelsohn, Columbia University, United States  
Carole Mendelson, UT Southwestern Medical Center, United States  
Anming Meng, Tsinghua University, China  
Nadia Mercader, Centro Nacional de Investigaciones Cardiovasculares, Spain  
Bradley Merrill, University of Illinois at Chicago, United States  
Jason Meyer, Indiana University School of Medicine, United States  
Joseph Miano, -, United States  
Irene Miguel-Aliaga, MRC Clinical Sciences Centre, United Kingdom  
Marja L. Mikkola, University of Helsinki, Finland  
Marco Milan, Institut de Recerca Biomedica (IRB), Spain  
Craig Miller, UC-Berkeley, United States  
Dana Miller, University of Washington, United States  
Naojiro Minami, Kyoto University, Japan  
Guo Li Ming, John Hopkins University, United States  
Parviz Minoo, University of Southern California, United States  
Rhona Mirsky, UCL, United Kingdom

Thomas Misgeld, TU Muenchen, Germany  
Yuji Mishina, University of Michigan, United States  
Pedro Miura, University of Nevada, Reno, United States  
takeshi miyamoto, Keio Univ., Japan  
Takaki Miyata, Nagoya Univ. Graduate Sch. Med., Japan  
Marek Mlodzik, Mt Sinai School of Medicine, United States  
Naoki Mochizuki, National Cerebral and Cardiovascular Center Research Institute, Japan  
Cecilia Moens, Fred Hutchinson Cancer Research Center, United States  
Ashley Moffett, Cambridge, United Kingdom  
Timothy Mohun, The Francis Crick Institute, United Kingdom  
George Moldovan, The Pennsylvania State University College of Medicine, United States  
Gergely Molnar, IST Austria, Austria  
Sebastien Mongrand, LABORATOIRE DE BIOGENESE MEMBRANAIRE, France  
Kelly Monk, Washington University School of Medicine, United States  
Gabriele Monshausen, Penn State University, United States  
Anne Monsoro-Burq, Institut Curie, INSERM U1021, CNRS, UMR 3347, France  
Tai Montgomery, Colorado State University, United States  
Sally Moody, George Washington University, United States  
Kathryn Moore, University of Utah, United States  
Eurico Morais-de-Sá, IBMC, Portugal  
Eduardo Moreno, University of Bern, Switzerland  
Bruce Morgan, Harvard Medical School, United States  
Marc Morgan, Northwestern University, United States  
Xavier Morin, Institute of Developmental Biology of Marseille, France  
Ed Morrissey, University of Pennsylvania, United States  
Christian Mosimann, University of Zürich, Switzerland  
Ivan Moskowitz, The University of Chicago, United States  
Arne Mould, U Oxford, United Kingdom  
Bernard Moussian, Interfaculty Institute for Cell Biology, Germany  
Kimberly Mowry, Brown University, United States  
Jonas Muhr, Ludwig Institute for Cancer Research, Sweden  
Yoh-suke Mukoyama, National Heart, Lung, and Blood Institute, United States  
Albrecht Muller, MSZ, Germany  
Mary C. Mullins, University of Pennsylvania, United States  
Christine Mummery, Leiden University Medical Center, Netherlands  
Ken Muneoka, Texas A&M University, United States  
Purificación Muñoz, Bellvitge Biomedical Research Institute (IDIBELL), Spain  
Edwin Munro, University of Chicago, United States  
Alysson Muotri, UCSD, United States  
Paula Murphy, Trinity College Dublin, Ireland  
Lewis Murtaugh, University of Utah, United States  
Senthil Muthuswamy, Cold Spring Harbor Laboratory, United States  
Makoto Nagano, McGill University, Canada  
Yaakov Nahmias, The Hebrew University of Jerusalem, Israel  
Yasushi Nakagawa, University of Minnesota, United States  
Kazunori Nakajima, Keio University School of Medicine, Japan  
Akira Nakamura, Institute of Molecular Embryology and Genetics, Kumamoto University, Japan  
Daisuke Nanba, Tokyo Medical and Dental University, Japan  
Maithreyi Narasimha, Tata Institute of Fundamental Research, India  
Dick Nassel, Stockholm University, Sweden  
Utpal Nath, Indian Inst of Science Bangalore, India  
Klaus-Armin Nave, MPI of Experimental Medicine, Germany  
Alex Nechiporuk, Oregon Health and Science University, United States

Serge Nef, University of Geneva Medical School, Switzerland  
Jennifer Nemhauser, University of Washington, United States  
Pierre Neveu, EMBL Heidelberg, Germany  
Stuart A. Newman, New York Medical College, United States  
Phillip Newmark, HHMI/ University of Illinois at Urbana-Champaign, United States  
Huck Hui Ng, Genome Institute of Singapore, Singapore  
Laurent Nguyen, Université de Liege, Belgium  
Kathy Niakan, The Francis Crick Institute, United Kingdom  
Jennifer Nichols, University of Cambridge, United Kingdom  
Scott Nichols, University of Denver, United States  
Christof Niehrs, IMB Institute of Molecular Biology gGmbH, Germany  
Carien Niessen, University of Cologne, Germany  
Philipp Niethammer, Memorial Sloan Kettering Cancer Center, United Kingdom  
Angela Nieto, Instituto de Neurociencias de Alicante, Spain  
Laura Nilson, McGill University, Canada  
Mikael Nilsson, Institute of Biomedicine, University of Gothenburg, Sweden  
Zachary Nimchuk, UNC Chapel Hill, United States  
Emi Nishimura, Tokyo Medical and Dental University, Japan  
Ryuichi Nishinakamura, Kumamoto University, Japan  
Lee Niswander, Howard Hughes Medical Institute, United States  
Hitoshi Niwa, RIKEN, Japan  
Mark Noble, University of Rochester Medical Center, United States  
Caren Norden, Max Planck Institute, Germany  
Dominic Norris, MRC Mammalian Genetics Unit, United Kingdom  
Trista North, Beth Israel Deaconess Medical Center, United States  
Stéphane Noselli, Université Nice, France  
Maria Cristina Nostro, UHN, Canada  
Bennett Novitch, UCLA School of Medicine, United States  
Moritz Nowack, VIB - Flemish Institute for Biotechnology, Belgium  
Ryan Null, UC Berkeley, United States  
Todd Nystul, UCSF, United States  
Andrew Oates, Francis Crick Institute/University College London, United Kingdom  
Elke Ober, University of Copenhagen, Denmark  
Donal O'Carroll, The University of Edinburgh, United Kingdom  
Kevin O'Connell, NIDDK/NIH, United States  
Michael O'Connor, University of Minnesota, United States  
Michael O'Connor, University of Western Sydney, Australia  
Kate O'Connor-Giles, University of Wisconsin-Madison, United States  
Remko Offringa, Leiden University, Netherlands  
Olav Oftedal, Smithsonian Institution, United States  
Takehiko Ogawa, Yokohama City University, Japan  
Atsuo Ogura, RIKEN Bioresource Center, Japan  
Paul Oh, University of Florida, United States  
Hayato Ohshima, Niigata University Graduate School of Medical and Dental Sciences, Japan  
Kazunori Okada, Okazaki Institute for Integrative Bioscience and National Institute for Basic Biology, Japan  
Odd Arne Olsen, Norwegian Univ Life Sciences, Norway  
Eric Olson, Univ of Texas Southwestern Med.Cntr., United States  
Bradley Olwin, University of Colorado, United States  
Steen Ooi, University College London, United Kingdom  
David Oppenheimer, University of Florida, United States  
Alana O'Reilly, Fox Chase Cancer Center, United States  
Naomi Ori, Hebrew University of Jerusalem, Israel  
Terry Orr-Weaver, Whitehead Institute, United States



Kyle Orwig, Magee-Womens Research Institute, United States  
Lars Ostergaard, John Innes Centre, United Kingdom  
Gary Owens, University of Virginia, United States  
David Owens, Columbia University, United States  
Leif Oxburgh, Maine Medical Center Research Institute, United States  
Michael Pack, University of Pennsylvania, United States  
Bertrand PAIN, U846 Inserm, France  
Jean-Christophe Palauqui, Laboratoire de Biologie Cellulaire, France  
James Palis, University of Rochester Medical Center, United States  
Duoja Pan, Johns Hopkins University School of Medicine, United States  
chunliang Pan, National Taiwan University, Taiwan  
Lia Panman, University of Leicester, United Kingdom  
Emmanuel Panteris, University of Athens, Greece  
Virginia Papaioannou, Columbia University Medical Center, United States  
Nancy Papalopulu, University of Manchester, United Kingdom  
Suzanne Paradis, Brandeis University, United States  
Francois Parcy, CNRS, France  
Malin Parmar, Lund University, Sweden  
Simona Parrinello, Imperial College, United Kingdom  
Michael Parsons, Johns Hopkins University, United States  
Juha Partanen, University of Helsinki, Finland  
Roger Patient, Oxford University, United Kingdom  
Elsbeth Payne, University College London, United Kingdom  
Bret Pearson, Hospital for Sick Children, Canada  
Rachael Pearson, University College London, United Kingdom  
matthew Pecot, harvard medical school, United States  
Bernard Peers, Université de Liège, Belgium  
Mark Peifer, University of North Carolina, United States  
Francisco Pelegri, University of Wisconsin-Madison, United States  
Giuseppa Pennetta, University of Edinburgh, United Kingdom  
Melissa Pepling, Syracuse University, United States  
Martin Pera, University of Melbourne, Australia  
Filipe Pereira, Center for Neuroscience and Cell Biology University of Coimbra, Portugal  
Franck Perez, Institut Curie, France  
Jose Manuel Perez-Perez, Universidad Miguel Hernandez de Elche, Spain  
Francesca Peri, EMBL Heidelberg, Germany  
Muriel Perron, Université Paris Sud, France  
Isabelle Peter, Caltech, United States  
Antoine Peters, Friedrich Miescher Institute for Biomedical Research, Switzerland  
Christian Petersen, Northwestern, United States  
Kevin Peterson, The Jackson Laboratory, United States  
Gert Pflugfelder, Mainz University, Germany  
Carolyn Phillips, University of Southern California, United States  
Anna Philpott, University of Cambridge, United Kingdom  
Stefano Piccolo, University of Padua School of Medicine, Italy  
Franck Pichaud, MRC, LMCB, United Kingdom  
Jan Pielage, Friedrich Miescher Institute, Switzerland  
Alessandra Pierani, Institut Jacques Monod CNRS Université Paris Diderot, France  
Christophe PIERREUX, de Duve Institute, Belgium  
Francesc Piferrer, Institute of Marine Science (ICM-CSIC), Spain  
Lynn Pillitteri, Western Washington University, United States  
Tatjana Piotrowski, Stowers Institute for Medical Research, United States  
Nicolas Plachta, A\* Star Institute of Molecular and Cell Biology, Singapore  
Marysia Placzek, University of Sheffield, United Kingdom

Timothy Plageman, The Ohio State University, United States  
Micheline Plateroti, University Lyon, France  
Anne Plessis, Institut Jacques Mondod UMR 7592, France  
Charles Plessy, RIKEN, Japan  
Maksim Plikus, University of California, Irvine, United States  
Berenika Plusa, University of Manchester, United Kingdom  
Lucia Poggi, University of Heidelberg, Germany  
Katherine Pollard, Gladstone Institutes & UC San Francisco, United States  
Franck Polleux, Columbia University, United States  
Luis Polo-Parada, University of Missouri-Columbia, United States  
Brian Popko, University of Chicago, United States  
Catherine Porcher, University of Oxford, United Kingdom  
Enzo Porrello, The University of Queensland, Australia  
David Port, U Colorado, United States  
James Posakony, University of California San Diego, United States  
Kenneth Poss, Duke University Medical Center, United States  
Michael Potente, Max Planck Institute, Germany  
Francis Poulat, Institut de Génétique Humaine, France  
Tom Pratt, University of Edinburgh, United Kingdom  
Ken Prehoda, University of Oregon, United States  
David J. Price, The University of Edinburgh, United Kingdom  
Victoria Prince, Univ. of Chicago, United States  
Andreas Prokop, The University of Manchester, United Kingdom  
Przemyslaw Prusinkiewicz, University of Calgary, Canada  
William Pu, Childrens Hospital Boston, United States  
Pier Lorenzo Puri, Sanford Burnham Medical Res. Inst., United States  
Jordan Raff, University of Oxford, United Kingdom  
David Raible, University of Washington, United States  
David Raizen, Univ of Pennsylvania, United States  
Jayaraj Rajagopal, Harvard University, United States  
Amy Ralston, Michigan State University, United States  
Thomas Rando, Stanford University, United States  
Adrian Ranga, Harvard University, United States  
Ryan Range, Mississippi State University, United States  
Matthew Rasband, Baylor College of Medicine, United States  
Emma Rawlins, University of Cambridge, United Kingdom  
Pamela Raymond, University of Michigan, United States  
Ilaria Rebay, University of Chicago, United States  
Peter Reddien, MIT, Whitehead Institute, HHMI, United States  
Kristy Red-Horse, Stanford University, United States  
Randall Reed, HHMI, United States  
Benjamin Reese, University of California, United States  
Orly Reiner, Weizmann Institute of Science, Israel  
Andrew Renault, University of Nottingham, United Kingdom  
Michael Rendl, Mount Sinai School of Medicine, United States  
Rainer Renkawitz, Justus-Liebig-University Giessen, Germany  
Lynn Riddiford, Howard Hughes Medical Institute, United States  
Jason Rihel, UCL, United Kingdom  
Filippo Rijli, Friedrich Miescher Institute (FMI), Switzerland  
Bruce Riley, Texas A&M University, United States  
Paul Riley, University of Oxford, United Kingdom  
Jochen Rink, MPI-CBG, Germany  
Gail Risbridger, Monash University, Australia  
Stefano Rivella, Children's Hospital of Philadelphia (CHoP), United States

Helene Robert, CEITEC Masaryk University, Czech Republic  
Stephanie Robert, Umea Plant Science Centre, Sweden  
Liz Robertson, University of Oxford, United Kingdom  
Michael Robinson, Miami University, United States  
Adrienne Roeder, California Institute of Technology, United States  
Hermann Rohrer, Max-Planck Institute Brain Res., Germany  
Brenda Rongish, Univ. of Kansas Medical Center, United States  
Marian Ros, Instituto de Biomedicina y Biotecnología de Cantabria, Spain  
Jeffrey Rosen, Baylor College of Medicine, United States  
Janet Rossant, The Hospital for Sick Children, Canada  
Siegfried Roth, University of Cologne, Germany  
Joel Rothman, University of California Santa Barbara, United States  
Pep Rotllant, CSIC, Spain  
Robbert Rottier, Erasmus MC, Netherlands  
Sudipto Roy, Institute of Molecular and Cell Biology, Singapore  
Stephane Roy, Universite de Montreal, Canada  
Christopher Royer, Oxford, United Kingdom  
Stefan Rudloff, University of Bern, Switzerland  
Peter Rugg-Gunn, Babraham Institute, United Kingdom  
Christiana Ruhrberg, UCL Institute of Ophthalmology, United Kingdom  
Mar Ruiz-Gomez, Universidad Autonoma, Spain  
Mark Running, University of Louisville, United States  
Eugenia Russinova, VIB, Belgium  
Gary Ruvkun, Massachusetts General Hospital, United States  
Soojin Ryu, Max Planck Institute for Medical Research, Germany  
Sabrina Sabatini, Universit  La Sapienza, Italy  
Robert Sablowski, John Innes Centre, United Kingdom  
Hesham Sadek, UT Southwestern, United States  
Susan Sadler, University of Denver, United States  
Takashi Sado, Kinki University, Japan  
Einat Sadot, Institute of Plant Sciences, Volcai Center, Israel  
Hidetoshi Saiga, Tokyo Metropolitan University, Japan  
Jean-Pierre Saint-Jeannet, New York University, United States  
Mitinori Saitou, Graduate School of Medicine, Kyoto University, Japan  
Lois Salamonsen, Prince Henry Institute of Medical research, United Kingdom  
Iris Salecker, The Francis Crick Institute, United Kingdom  
Patricia Salinas, University College London, United Kingdom  
Emilio Salo, Universitat de Barcelona, Spain  
Paolo Salomoni, UCL cancer institute, United Kingdom  
Helen Salz, Case Western Reserve University, United States  
Christos Samakovlis, The Wenner-Gren Institute, Sweden  
Arun Sampathkumar, California Institute of Technology, United States  
Alejandro Sanchez Alvarado, Stowers Institute for Medical Research, United States  
Joshua R. Sanes, Harvard University, United States  
Savita Sankar, Washinton University in St. Louis, United States  
Owen Sansom, Beatson Inst for Cancer Res., United Kingdom  
Vittorio Sartorelli, NIAMS, United States  
Hiroshi Sasaki, Osaka University, Japan  
Yasunori Sasakura, University of Tsukuba, Japan  
Nori Satoh, Okinawa Institute of Science and Technology, Japan  
Akira Satoh, Okayama University, Japan  
Frederic SAUDOU, Univ Grenoble Alpes -Inserm, France  
Norman Saunders, The University of Melbourne, Australia  
Pierre Savatier, INSERM U1208, France

Kazunobu Sawamoto, Nagoya City University, Japan  
Michael Scanlon, Cornell University, United States  
David Schaffer, University of California, Berkeley, United States  
Anton Schaffner, Helmholtz Zentrum München, Germany  
George Schaller, Dartmouth College, United States  
Alexandra Schambony, Universitaet Erlangen-Nuernberg, Germany  
Heide Schatten, University of Missouri, United States  
Peter Scheiffele, Biozentrum University Basel, Switzerland  
Alexander Schier, Harvard University, United States  
Thomas Schilling, University of California, Irvine, United States  
Alejandro Schinder, Instituto Leloir, Argentina  
Karen Schindler, Rutgers, United States  
Ernestina Schipani, University of Michigan, United States  
David Schlessinger, NIA/IRP-NIH, United States  
Urs Schmidt-Ott, University of Chicago, United States  
Stephan Schneider, Iowa State University, United States  
Sylvie Schneider-Maunoury, Institut de Biologie, Paris Seine, France  
Frank Schnorrer, MPI of Biochemistry, Germany  
Thorsten Schnurbusch, Leibniz Institute of Plant Genetics and Crop Plant Research (IPK), Germany  
Hans Schöler, Max Planck Institute for Molecular Biomedicine, Germany  
Hubert Schorle, Bonn University Medical School, Germany  
Julian Schroeder, University of California, San Diego, United States  
Christian Schroeter, Max Planck Institute of Molecular Physiology, Germany  
Reinhard Schuh, MPI, Germany  
Melina Schuh, MRC, United Kingdom  
Stefan Schulte-Merker, WWU Münster, Germany  
Richard Schultz, University of Pennsylvania, United States  
Cordula Schulz, University of Georgia, United States  
Linus Schumacher, Imperial College London, United Kingdom  
Trudi Schupbach, HHMI/Princeton University, United States  
Carol Schuurmans, Sunnybrook Research Institute, Canada  
Martin Schwander, Rutgers University, United States  
Francois Schweisguth, Institut Pasteur, France  
Ronen Schweitzer, Shriners Hospital for Children, Portland, United States  
James Schwob, Tufts University School of Medicine, United States  
Ian Scott, The Hospital for Sick Children, Canada  
Charlie Scutt, ENS Lyon, France  
Julie Secombe, Albert Einstein College of Medicine, United States  
Neil Segil, House Ear Institute, United States  
Neil Segil, Keck School of Medicine of University of Southern California, United States  
Kerstin Seidel, University of California San Francisco, United States  
Ashley Seifert, University of Kentucky, United States  
Jun Seita, Stanford University School of Medicine, United Kingdom  
Licia Selleri, Weill Medical College, United States  
Henrik Semb, Lund University, Sweden  
Giovanni Sena, Imperial College, United Kingdom  
Manuel Serrano, Spanish National Cancer Research Center (CNIO), Spain  
Palle Serup, Copenhagen University, Denmark  
Eve Seuntjens, KU Leuven, Belgium  
Salim Seyfried, Potsdam University, Germany  
Eilon Shani, Tel Aviv University, Israel  
John Shannon, Cincinnati Children's Hospital Medical Center, United States  
Mike Shapiro, University of Utah, United States

Jafar Sharif, RIKEN-IMS, Japan  
Paul Sharpe, Kings College London, United Kingdom  
James Sharpe, Centre for Genomic Regulation (CRG), Spain  
wenjing She, Institute of plant biology, Switzerland  
Michael Sheets, University of Wisconsin, United States  
Michael Shen, Columbia University Medical Center, United States  
Kang Shen, Stanford University, United States  
Zu-Hang Sheng, NIH, United States  
Guojun Sheng, Kumamoto University, Japan  
Yun-Bo Shi, NICHD/NIH, United States  
Songtao Shi, University of Pennsylvania, United States  
Ben-Zion Shilo, Weizmann Institute, Israel  
Tomomi Shimogori, RIKEN BSI, Japan  
Takashi Shinohara, Kyoto University, Japan  
Ramesh Shivdasani, Dana-Farber Cancer Institute, United States  
Alena Shkumatava, Institut Curie, France  
Elena Shpak, University of Tennessee, United States  
Chisa Shukunami, Institute of Biomedical & Health Sciences, Hiroshima University, Japan  
Stanislav Shvartsman, Princeton University, United States  
Arndt Siekmann, Max Planck Institute for Molecular Biomedicine, Germany  
Debra Silver, Duke University Medical Center, United States  
Antonio Simeone, Institute of Genetics and Biophysics, Italy  
Ruediger Simon, Heinrich-Heine University, Germany  
Kai Simons, Max Planck Institute of Molecular Cell biology, Germany  
Benjamin Simons, University of Cambridge, United Kingdom  
Robert Singer, Albert Einstein College of Medicine, United States  
Andrew Singson, Waksman Institute, Rutgers University, United States  
Neelima Sinha, Univ of CALifornia, United States  
Hazel Sive, Whitehead Institute/ MIT, United States  
William Skarnes, Wellcome Trust Sanger Institute, United Kingdom  
James Skeath, Washington University School of Medicine, United States  
Ahna Skop, University of Wisconsin - Madison, United States  
Ruth Slack, University of Ottawa, Canada  
Frank Slack, Institute for RNA Medicine, United States  
Matthew Slattery, University of Minnesota Medical School, United States  
Alistair Sloan, Cardiff University, United Kingdom  
Keith Slotkin, Ohio State University, United States  
Nicola Smart, DPAG, Oxford, United Kingdom  
Austin Smith, University of Cambridge, United Kingdom  
William Smith, UCSB, United States  
Alison Smith, John Innes Centre, United Kingdom  
Richard Smith, Max Planck Institute for Plant Breeding Research, Germany  
Stephen Smith, Allen Institute for Brain Science, United States  
Steven Smith, University of Tasmania, Australia  
David Smyth, Monash University, Australia  
Ian Smyth, Monash University, Australia  
Hans-Willem Snoeck, Columbia University Medical Center, United States  
Michael Soares, Institute of Maternal-Fetal Biology, United States  
Anna Marie Sokac, Baylor College of Medicine, United States  
Sergei Sokol, Mount Sinai Medical School, United States  
David Solecki, St. Jude Children's Research Hospital, United States  
Lilianna Solnica-Krezel, Washington University School of Medicine, United States  
jerome Solon, CRG, Spain  
Davor Solter, Max-Planck Institute, United States



Lukas Sommer, University of Zurich, Switzerland  
Philippe Soriano, Mt Sinai School of Medicine, United States  
Martha Soto, Rutgers -Robert Wood Johnson Medical School, United States  
Jane Sowden, UCL Institute of Child Health, United Kingdom  
Francesca Spagnoli, Max Delbrueck Center for Molecular Medicine, Germany  
Jason Spence, University of Michigan, United States  
Tom Spencer, University of Missouri, United States  
Patricia Springer, University of California, United States  
David Sprinzak, Tel Aviv University, Israel  
Martin Srayko, University of Alberta, Canada  
Deepak Srivastava, University of California San Francisco, United States  
Mansi Srivastava, Srivastava Lab, United States  
H. Stadler, Oregon Health and Science University, United States  
Didier Stainier, Max Planck Institute, Germany  
Pamela Stanley, Albert Einstein, United States  
Edouard Stanley, Murdoch Childrens Research Institute, Australia  
Carine Stapel, MPI-CBG, Germany  
Daniel Starr, Univ. Calif. Davis, United States  
Robert Steele, University of California, Irvine, United States  
Richard Steet, University of Georgia, United States  
David Stein, Univ of Texas, United States  
Mary Stepp, The George Washington University, United States  
Claudio Stern, University College London, United Kingdom  
Francis Stewart, Dresden University of Technology, Germany  
David Stocum, Indiana University-Purdue University Indianapolis, United States  
Esther Stoeckli, University of Zurich, Switzerland  
Kate Storey, University of Dundee, United Kingdom  
Lucia Strader, Washington University in St Louis, United States  
Andrea Streit, King's College London, United Kingdom  
Michele Studer, Institute of Biology Valrose, iBV, France  
Claudia Stuermer, University of Konstanz, Germany  
Chris Sturgeon, Washington University, United States  
Kuppuswamy Subramaniam, Indian Institute of Technology, India  
Keiko Sugimoto, RIKEN CSRS, Japan  
Asako Sugimoto, Graduate School of Life Sciences, Tohoku University, Japan  
Hei Sook Sul, University of California, Berkeley, United States  
William Sullivan, University of California, United States  
Saulius Sumanas, Cincinnati Children's Hospital Medical Center, United States  
Zhaoxia Sun, Yale School of Medicine, United States  
Xin Sun, University of Wisconsin-Madison, United States  
Sibum Sung, University of Texas, United States  
Azim Surani, Wellcome Trust/Cancer Research UK Gurdon Institute, United Kingdom  
Magali Suzanne, Toulouse, France  
Karl Swann, Cardiff University, United Kingdom  
Sean Sweeney, The University of York, United Kingdom  
Larry Taber, Washington University, United States  
Cliff Tabin, Harvard Medical School, United States  
Masazumi Tada, University College London, United Kingdom  
Million Tadege, Oklahoma State University, United States  
Shahragim Tajbakhsh, Institut Pasteur, France  
Shin Takagi, Nagoya University, Japan  
Yoshiko Takahashi, Kyoto University, Japan  
Masatoshi Takeichi, RIKEN Center for Developmental Biology, Japan  
Patrick Tam, Childrens Medical Research Institute, Australia

Elly Tanaka, Research Institute for Molecular Pathology, Austria  
Guy Tanentzapf, The University of British Columbia, Canada  
Lisa Taneyhill, University of Maryland, United States  
Naoki Tanimizu, Sapporo Medical University School of Medicine, Japan  
Keiji Tanimoto, University of Tsukuba, Japan  
Victor Tarabykin, Inst for Cell Biology & Neurobiology, at the Charite, Germany  
Robert Taylor, Wake Forest University School of Medicine, United States  
Sally Temple, Neural Stem Cell Institute, United States  
Manuel Tena-Sempere, University of Cordoba, Spain  
Matthew Terry, University of Southampton, United Kingdom  
Christa Testerink, University of Amsterdam, Netherlands  
Thomas Theil, University of Edinburgh, United Kingdom  
Marcus Thelen, IRB, Switzerland  
Klaus Theres, Max Planck Institute for Plant Breeding Research, Germany  
Pascal Therond, CNRS-UMR6543, France  
Irma Thesleff, Univ of Helsinki, Finland  
Thorold Theunissen, Whitehead Institute for Biomedical Research, United States  
Jean Paul Thiery, dept biochemistry, Singapore  
Stefan Thor, Linköping University, Sweden  
Solveig Thorsteinsdottir, Faculdade de Ciências da Universidade de Lisboa, Portugal  
Fadel Tissir, Universite Catholique de Louvain, Belgium  
Shubha Tole, Tata Institute of Fundamental Research, India  
Pavel Tomancak, Max Planck Institute, Germany  
Andrew Tomlinson, Columbia University, United States  
Keiko Torii, University of Washington, United States  
Maria Elena Torres-Padilla, IGBMC, France  
Tim Townes, UAB School of Medicine, United States  
Jan Traas, ENS-Lyon, France  
Paul Trainor, Stowers Institute for Medical Research, United States  
Cole Trapnell, University of Washington, United States  
David Traver, University of California, San Diego, United States  
Mathias Treier, Max-Delbrück Center for Molecular Medicine (MDC), Germany  
Jessica Treisman, Skirball Institute, United States  
Miltos Tsiantis, Max Planck Institute for Plant Breeding Research, Germany  
Hirokazu Tsukaya, The University of Tokyo, Japan  
Alexander Tsygankov, Temple University, United States  
Abigail Tucker, King's College London, United Kingdom  
Franziska Turck, Max Planck Institute for Plant Breeding Research, Germany  
Simon Turner, The University of Manchester, United Kingdom  
James Turner, MRC NIMR, United Kingdom  
David Tuveson, Cold Spring Harbor Laboratory, United States  
Tadashi Uemura, Kyoto University, Japan  
Joachim Urban, Universitat Mainz, Germany  
Thomas Vaccari, IFOM-IEO, Italy  
Prasad Vaddepalli, Technical University Munich, Germany  
L Valdivia, University College London, United Kingdom  
Ludovic Vallier, Cambridge University, United Kingdom  
Sander van den Heuvel, Utrecht University, Netherlands  
Maurijn van der Zee, Leiden University, Netherlands  
Mark Van Doren, Johns Hopkins University, United States  
Jaimie Van Norman, University of California, Riverside, United States  
Pierre Vanderhaeghen, Universite Libre de Bruxelles, Belgium  
Nadine Vastenhouw, Max Planck Institute of Molecular Cell Biology and Genetics, Germany  
Esther Verheyen, Simon Fraser University, Canada

Marie-Helene Verlhac, CIRB, College de France, France  
Joop Vermeer, University of Zurich, Switzerland  
Julien Vermot, IGBMC, France  
Teva Vernoux, ENS Lyon, France  
Michael Verzi, Rutgers University, United States  
Monica Vetter, University of Utah, United States  
Chad Vezina, University of Wisconsin-Madison, United States  
Christoph Viebahn, Göttingen University, Germany  
K VijayRaghavan, National Centre for Biological Sciences, India  
Jean-Paul Vincent, National Institute Medical Research, United Kingdom  
Stephane Vincent, IGBMC, France  
Alain Vincent, CNRS/Université Paul Sabatier, France  
Jane Visvader, The Walter and Eliza Hall Institute of Medical Research, Australia  
Kris Vleminckx, VIB - Ghent University, Belgium  
Talila Volk, Weizmann Institute, Israel  
Albrecht von Arnim, University of Tennessee, United States  
Andrea Vortkamp, Abteilung fuer Entwicklungsbiologie, Germany  
Anne Voss, Walter and Eliza Hall Institute of Medical Research, Australia  
Stephen Voss, University of Kentucky, United States  
Sophie Vriz, University Denis Diderot - Paris 7, France  
William Wadsworth, Rutgers Robert Wood Johnson Medical School, United States  
Amy Wagers, Harvard University, Joslin Diabetes Center, United States  
Doris Wagner, University of Pennsylvania, United States  
Daniel Wagner, Rice University, United States  
Gunter Wagner, Yale, United States  
Brandon Wainwright, The University of Queensland, Australia  
John Walker, University of Missouri-Columbia, United States  
John Wallingford, University of Texas, United States  
Lucas Waltzer, Centre de Biologie du Développement, France  
Jeremy Wang, University of Pennsylvania, United States  
Da-Zhi Wang, Boston Children's Hospital, United States  
ronald wang, the chinese university of hong kong, Hong Kong  
Zhi-Yong Wang, Carnegie Institution for Science, United States  
Jianlong Wang, Mount Sinai School of Medicine, United States  
Qiang Wang, Nanjing Medical University, China  
Michiko Watanabe, Case Western Reserve, United States  
Naoki Watanabe, Kyoto University Graduate School of Medicine, Japan  
Erica Watson, University of Cambridge, UK, United Kingdom  
Joshua Waxman, Cincinnati Children's Medical Center, United States  
Gilbert Weidinger, Ulm University, Germany  
Cornelis Weijer, University of Dundee, United Kingdom  
Dolf Weijers, Wageningen University, Netherlands  
Brant Weinstein, NICHD, NIH, United States  
David Weisblat, University of California, Berkeley, United States  
Deneen Wellik, University of Michigan Medical Center, United States  
Frank Wellmer, Trinity College Dublin, Ireland  
Monte Westerfield, Institute of Neuroscience, United States  
Franco Weth, Karlsruhe Institute of Technology, Germany  
Rob White, Univ of Cambridge, United Kingdom  
Richard White, Memorial Sloan Kettering Cancer Center, United States  
Helen White-Cooper, Cardiff University, United Kingdom  
Jessica Whited, Harvard Medical School and Brigham & Women's Hospital, United States  
Tanya Whitfield, University of Sheffield, United Kingdom  
Kathleen Whitlock, Universidad de Valparaíso, Chile

Jeffrey Whitsett, Cincinnati Children's Hospital Medical Center, United States  
Hynek Wichterle, Columbia University Medical Center, United States  
Ray Wightman, Sainsbury Laboratory Cambridge University, United Kingdom  
Dagmar Wilhelm, The University of Melbourne, Australia  
David Wilkinson, Francis Crick Institute, United Kingdom  
Holger Willenbring, UCSF, United States  
Carmen Williams, NIH/NIEHS, United States  
Bart Williams, Van Andel Research Institute, United States  
Ernst Wimmer, Georg-August-University Goettingen, Germany  
Christoph Winkler, National University of Singapore, Singapore  
Joachim Wittbrodt, Heidelberg University, Germany  
Andreas Wodarz, University of Cologne, Germany  
Sebastian Wolf, COS Heidelberg, Germany  
Uwe Wolfrum, Institute of Zoology, Cell and Matrix Biology, Germany  
Albert Wong, University of Toronto, Canada  
Susan Wray, NINDS, NIH, United States  
Christopher Wright, Vanderbilt University, United States  
Nicholas Wright, Barts Cancer Institute, United Kingdom  
Doris Wu, National Institute on Deafness, United States  
Yi Chun Wu, National Taiwan University, Taiwan  
Ting Wu, Harvard, United States  
Qingyu Wu, Cleveland Clinic, United States  
Anton Wutz, Institute of Molecular Health Sciences, Switzerland  
Claire Wyart, Institut du cerveau et de la moelle épinière, ICM, United Kingdom  
Anthony Wynshaw-Boris, Case Western Reserve University, School of Medicine, United States  
Joanna Wysocka, Stanford University School of Medicine, United States  
Rongwen Xi, National Institute of Biological Sciences, China  
Ting Xie, Stowers Institute, United States  
Lin Xu, Institute of Plant Physiology and Ecology, China  
Shaul Yalovsky, Tel Aviv University, Israel  
Kenneth Yamada, NIH, United States  
Gen Yamada, Wakayama Medical University, Japan  
Naoki Yamanaka, UC Riverside, United States  
Yukiko Yamashita, University of Michigan, Ann Arbor, United States  
Takayoshi Yamaza, Kyushu University School of Dental Science, Japan  
Martin Yanofsky, UCSD, United States  
Hitoyoshi Yasuo, CNRS/UMR7009, France  
Bing Ye, University of Michigan, United States  
Deborah Yelon, University of California, San Diego, United States  
William Yeung, University of Hong Kong, China  
Chunyue Yin, Cincinnati Children's Hospital, United States  
Mervin Yoder, Indiana Univ. School of Medicine, United States  
Shosei Yoshida, National Institute for Basic Biology, Japan  
H. Joseph Yost, University of Utah, United States  
Heather Young, University of Melbourne, Australia  
Rodrigo Young, UCL, United Kingdom  
Jing Yu, University of Virginia, United States  
Yi Tao Yu, University of Rochester Medical Center, United States  
Katherine Yutzey, Children's Medical Center Cincinnati, United States  
Donald Zack, Johns Hopkins University School of Medicine, United States  
Jennifer Zallen, Sloan-Kettering Institute, United States  
Peter Zandstra, University of Toronto, Canada  
Ken Zaret, University of Pennsylvania School of Medicine, United States

David Zarkower, University of Minnesota, United States  
Ricardo Zayas, San Diego State University, United States  
Martin Zeidler, University of Sheffield, United Kingdom  
Robert Zeller, San Diego State University, United States  
Elazar Zelzer, Weizmann Institute of Science, Israel  
Magdalena Zernicka-Goetz, Gurdon Institute, United Kingdom  
Dabing Zhang, Shanghai Jiaotong University, China  
Jian Zhang, Institute of Genetics and Developmental Biology, Chinese Academy of Sciences, China  
Xin Zhang, Columbia University, United States  
Chun-Li Zhang, UT Southwestern Medical Center, United States  
Dazhong Zhao, University of Wisconsin-Milwaukee, United States  
Jing Crystal Zhao, Sanford Burnham Prebys, United States  
Mei Zhen, Sinai Health System, Canada  
Bin Zhou, Vanderbilt University, United States  
Alan Zhu, Peking University, China  
Xin-Guang Zhu, CAS-MPG Partner Institute for Computational Biology, China  
Robert Zinzen, Max Delbrück Center for Molecular Medicine, Germany  
Barry Zirk, Johns Hopkins University, United States  
Aaron Zorn, Cincinnati Children's Hospital, United States  
Hongyan Zou, Mount Sinai, United States  
Ann Zovein, UCSF, United States
